# Supplementary material for: DETORQUEO, QUIRKY, and ZERZAUST Represent Novel Components Involved in Organ Development Mediated by the Receptor-Like Kinase STRUBBELIG in Arabidopsis thaliana
Source: PLoS Genet. 2009 Jan 30;5(1):e1000355. doi: 10.1371/journal.pgen.1000355 (PMC2628281; doi:10.1371/journal.pgen.1000355)
Supplement: Dataset S2 — This list details the 93 genes that show significant changes in expression level in all Ler versus sub-like mutant (slm) comparisons. This list thus comprises the flower core target gene list. (0.07 MB XLS) [file pgen.1000355.s002.xls]

## Sheet: Sheet 1 - Table 1
DETORQUEO, QUIRKY, and ZERZAUST Represent Novel Components Involved in Organ Development Mediated by the Receptor-like Kinase STRUBBELIG in Arabidopsis thaliana
Lynette Fulton, Martine Batoux, Ram Kishor Yadav, Wolfgang Busch, Stig U. Andersen, Jan U. Lohmann and Kay Schneitz
Supplementary Dataset 2: Flower
This list details the 93 genes that show significant changes in expression level in all Ler versus sub-like mutant (slm) comparisons. This list thus comprises the flower core target gene list.
Note: Z-score based meta-analysis was carried out using pairwise comparisons of individual replicates to generate this gene list. For reasons of simplicity, however, average fold change values and Z-scores are only shown.
Affy ID: Affymetrix ATH1 probe identifier
AGI: Arabdidopsis Genome Initiative identifier
Ler_apex_ref_log2: the log2 transformation of gene expression in Ler (reference)
log2_FC_slm/Ler: the log2 transformation of expression fold-change (FC) between specified mutant genotype and Ler.
Zs_slm/Ler: Z-score for a given Ler versus slm comparison.
Description: TAIR6 gene description
Affy_ID	AGI	Ler_flower ref_log2	log2_FC sub-1/Ler	ZS sub-1/Ler	log2_FC sub-3/Ler	ZS sub-3/Ler	log2_FC doq-1/Ler	ZS doq-1/Ler	log2_FC qky-8/Ler	ZS qky-8/Ler	log2_FC zet-2/Ler	ZS zet-2/Ler	Description
245035_at	AT2G26400	5.60394	-1.12924	-3.0586	-0.945865	-2.48767	-0.916892	-2.21198	-0.850372	-2.67305	-1.37678	-3.72966	acireductone dioxygenase (ARD/ARD') family protein, similar to iron-deficiency induced gene (Hordeum vulgare) GI:14522834, SIPL (Homo sapiens) GI:16551383; contains Pfam profile PF03079: ARD/ARD' family
245329_at	AT4G14365	7.81863	-4.59348	-12.3253	-2.18006	-5.64538	-1.35409	-3.2626	-2.60588	-8.09458	-4.1279	-11.1715	zinc finger (C3HC4-type RING finger) family protein / ankyrin repeat family protein, contains Pfam profile: PF00097 zinc finger, C3HC4 type (RING finger) and Pfam profile: PF00023 ankyrin repeat
246279_at	AT4G36740	3.07797	1.01329	2.62509	2.35962	5.88766	2.16658	5.09088	1.75539	5.34821	0.906466	2.45124	Encodes a homeodomain leucine zipper class I (HD-Zip I) protein.
246293_at	AT3G56710	5.27035	-2.25171	-6.0695	-1.97023	-5.08474	-1.71927	-4.11923	-1.7229	-5.29949	-2.52143	-6.76067	sigA-binding protein, identical to SigA binding protein (Arabidopsis thaliana) gi|6980074|gb|AAF34713; contains Pfam PF05678: VQ motif
246406_at	AT1G57650	4.01955	-1.77335	-4.789	-1.76091	-4.54967	-1.36153	-3.26798	-1.76491	-5.44871	-1.77746	-4.77574	disease resistance protein (NBS-LRR class), putative, domain signature NBS-LRR exists, suggestive of a disease resistance protein.
247314_at	AT5G64000	3.96612	-1.58022	-4.27777	-1.41118	-3.67361	-0.899695	-2.22248	-1.46694	-4.565	-1.56587	-4.23344	3'(2'),5'-bisphosphate nucleotidase, putative / inositol polyphosphate 1-phosphatase, putative, similar to SP|Q42546 3'(2'),5'-bisphosphate nucleotidase (EC 3.1.3.7) {Arabidopsis thaliana}; contains Pfam profile PF00459: Inositol monophosphatase family
247602_at	AT5G60900	3.80297	-1.34553	-3.64599	-1.31796	-3.41755	-1.31491	-3.10867	-1.30084	-3.99608	-1.34249	-3.57165	lectin protein kinase family protein, contains Pfam domains, PF01453: Lectin (probable mannose binding) and PF00069: Protein kinase domain
247604_at	AT5G60950	6.32471	-3.5059	-9.42371	-2.05485	-5.32539	-1.68254	-4.0111	-2.15304	-6.669	-3.47613	-9.38484	phytochelatin synthetase-related, contains Pfam profile PF04833: Phytochelatin synthetase-like conserved region
247796_at	AT5G58782	3.88805	-1.43556	-3.88793	-1.33019	-3.46619	-1.04579	-2.51345	-1.11261	-3.50849	-1.30536	-3.55782	dehydrodolichyl diphosphate synthase, putative / DEDOL-PP synthase, putative, similar to GI:796076
248062_at	AT5G55450	10.0573	-3.91778	-10.4921	-2.01891	-5.22168	-1.45855	-3.53092	-1.9191	-5.94472	-3.91954	-10.5911	protease inhibitor/seed storage/lipid transfer protein (LTP) family protein, contains Pfam protease inhibitor/seed storage/LTP family domain PF00234
248118_at	AT5G55050	5.77371	-2.15704	-5.81922	-2.05203	-5.32559	-2.06254	-4.86858	-1.60749	-4.9426	-1.98302	-5.30547	GDSL-motif lipase/hydrolase family protein, similar to family II lipases EXL3 GI:15054386, EXL1 GI:15054382, EXL2 GI:15054384 from (Arabidopsis thaliana); contains Pfam profile PF00657: GDSL-like Lipase/Acylhydrolase
248164_at	AT5G54490	4.24381	-1.10874	-3.02075	-1.01099	-2.6458	-1.00511	-2.40041	-1.14269	-3.54498	-1.03796	-2.78044	calcium-binding EF-hand protein, putative, similar to EF-hand Ca2+-binding protein CCD1 (Triticum aestivum) GI:9255753; contains INTERPRO:IPR002048 calcium-binding EF-hand domain
248169_at	AT5G54610	5.35898	-3.25022	-8.73729	-2.71027	-6.99109	-1.81708	-4.38301	-2.1478	-6.70633	-3.25352	-8.82574	Induced in response to Salicylic acid. Belongs to the ankyrin repeat protein family.
248284_at	AT5G52975	3.4581	-1.25406	-3.40651	-1.23928	-3.23174	-1.23821	-2.98481	-0.957682	-2.99813	-1.15782	-3.12545	expressed protein
249417_at	AT5G39670	6.17705	-3.31428	-8.92368	-2.69501	-6.95627	-1.8771	-4.49118	-2.2344	-6.96771	-3.2566	-8.85367	calcium-binding EF hand family protein, contains INTERPRO:IPR002048 calcium-binding EF-hand domain
249719_at	AT5G35735	6.35814	-2.20919	-5.97851	-1.60576	-4.17079	-1.78078	-4.29816	-1.95637	-6.04896	-2.61045	-7.03348	auxin-responsive family protein, similar to auxin-induced protein AIR12 GI:11357190 (Arabidopsis thaliana)
249754_at	AT5G24530	6.20215	-2.40204	-6.45822	-1.37004	-3.56853	-1.34309	-3.27851	-1.57231	-4.88183	-2.20687	-5.96365	oxidoreductase, 2OG-Fe(II) oxygenase family protein, similar to flavanone 3-hydroxylase (Persea americana)(GI:727410); contains PF03171 2OG-Fe(II) oxygenase superfamily domain
249890_at	AT5G22570	3.89549	-1.59498	-4.30558	-1.57117	-4.04717	-1.58245	-3.68788	-1.58265	-4.81163	-1.58458	-4.17516	WRKY family transcription factor, contains Pfam profile: PF03106 WRKY DNA -binding domain
249918_at	AT5G19240	8.92244	-3.39958	-9.12462	-2.04182	-5.28326	-1.65383	-3.97396	-2.01398	-6.21692	-3.1134	-8.37831	expressed protein
249983_at	AT5G18470	5.20541	-2.88676	-7.75833	-2.32079	-5.98782	-2.41074	-5.76671	-2.78756	-8.56442	-2.88428	-7.74096	curculin-like (mannose-binding) lectin family protein, contains Pfam profile: PF01453 lectin (probable mannose binding)
250279_at	AT5G13200	5.0545	-1.75888	-4.74216	-1.07271	-2.83184	-1.2795	-3.13543	-1.52153	-4.76374	-2.09839	-5.7024	GRAM domain-containing protein / ABA-responsive protein-related, similar to ABA-responsive protein (Hordeum vulgare) GI:4103635; contains Pfam profile PF02893: GRAM domain
250286_at	AT5G13320	6.04754	-1.03908	-2.82344	-1.16772	-3.06558	-1.12494	-2.72277	-1.12508	-3.53101	-1.07685	-2.9181	auxin-responsive GH3 family protein, similar to auxin-responsive GH3 product (Glycine max) GI:18591; contains Pfam profile PF03321: GH3 auxin-responsive promoter
250942_at	AT5G03350	8.45626	-4.63719	-12.4126	-2.60643	-6.698	-2.60496	-6.23296	-2.67179	-8.24385	-4.33091	-11.6723	legume lectin family protein, contains Pfam domain, PF00139: Legume lectins beta domain
251400_at	AT3G60420	7.91592	-4.18195	-11.2241	-2.62236	-6.74956	-1.39053	-3.36509	-2.39471	-7.42282	-3.4033	-9.20277	expressed protein
251625_at	AT3G57260	9.39119	-6.62052	-17.719	-2.01665	-5.21028	-1.64811	-3.91682	-2.64907	-8.11516	-6.02188	-16.188	glycosyl hydrolase family 17 protein, similar to glucan endo-1,3-beta-glucosidase, acidic isoform precursor SP:P33157 from (Arabidopsis thaliana)
251705_at	AT3G56400	8.81366	-2.47427	-6.67533	-1.47301	-3.82358	-0.842695	-2.00103	-1.77049	-5.47239	-2.51225	-6.74845	WRKY family transcription factor, DNA-binding protein 4 WRKY4 - Nicotiana tabacum, EMBL:AF193771
252076_at	AT3G51660	3.64805	-1.51982	-4.11747	-1.26269	-3.29852	-1.2879	-3.10146	-1.38841	-4.31849	-1.31682	-3.55682	macrophage migration inhibitory factor family protein / MIF family protein, contains Pfam profile: PF01187 Macrophage migration inhibitory factor family(MIF)
252098_at	AT3G51330	3.29889	-1.00804	-2.74601	-0.979734	-2.56266	-0.872894	-2.08901	-0.99721	-3.07973	-0.997041	-2.65604	aspartyl protease family protein, contains Eukaryotic and viral aspartyl proteases active site, PROSITE:PS00141
252131_at	AT3G50930	4.49013	-1.7212	-4.6596	-1.77922	-4.6031	-1.25595	-2.99655	-1.72258	-5.34499	-1.73721	-4.69149	AAA-type ATPase family protein, contains Pfam profile: ATPase family PF00004
252136_at	AT3G50770	4.54322	-2.26861	-6.11188	-1.43295	-3.73909	-1.44396	-3.40852	-2.1254	-6.53655	-1.93841	-5.19077	calmodulin-related protein, putative, similar to regulator of gene silencing calmodulin-related protein GI:12963415 from (Nicotiana tabacum)
252345_at	AT3G48640	7.07407	-4.13876	-11.1115	-2.8873	-7.4134	-1.32167	-3.22229	-2.31436	-7.13479	-4.06342	-10.9499	expressed protein
252346_at	AT3G48650	3.65734	-1.2741	-3.46304	-1.2221	-3.19964	-1.09975	-2.72743	-1.23891	-3.90196	-1.23724	-3.38623	pseudogene, At14a-related protein, similar to At14a (GI:11994571 and GI:11994573) (Arabidopsis thaliana)
252373_at	AT3G48090	5.7903	-1.41526	-3.82626	-1.71092	-4.42859	-0.850507	-2.06292	-1.01647	-3.20776	-1.1114	-3.03095	disease resistance protein (EDS1), identical to disease resistance protein/lipase homolog EDS1 GI:4454567; contains Pfam profile PF01764: Lipase
252417_at	AT3G47480	5.60572	-2.42908	-6.54706	-2.30989	-5.95926	-1.6163	-4.02348	-2.11376	-6.58296	-2.40807	-6.55041	calcium-binding EF hand family protein, contains INTERPRO:IPR002048 calcium-binding EF-hand domain
252920_at	AT4G39000	3.87505	-1.2817	-3.51125	-1.67794	-4.34981	-1.7736	-4.30015	-1.68238	-5.24621	-1.07308	-2.92572	glycosyl hydrolase family 9 protein, endo-1,4-beta-glucanase precursor - Fragariax ananassa, PID:g3549291
252921_at	AT4G39030	4.25104	-1.07341	-2.94136	-1.90565	-4.92162	-1.50688	-3.65882	-1.46784	-4.55485	-1.88854	-5.07887	enhanced disease susceptibility 5 (EDS5) / salicylic acid induction deficient 1 (SID1), identical to SP|Q945F0; contains Pfam profile PF01554: Uncharacterized membrane protein family
253461_at	AT4G32170	5.13459	-2.14838	-5.79366	-1.45614	-3.7581	-1.43153	-3.37769	-1.13541	-3.53281	-1.46153	-3.94975	cytochrome P450, putative, cytochrome p450, Arabidopsis thaliana, PID:G2252844
253634_at	AT4G30590	4.18335	-1.11194	-3.02805	-1.47867	-3.85217	-1.35453	-3.22803	-0.973622	-3.06942	-1.23746	-3.37632	plastocyanin-like domain-containing protein
254229_at	AT4G23610	4.09195	-1.52747	-4.13759	-1.38964	-3.62014	-1.27945	-3.05721	-1.47341	-4.59446	-1.48535	-4.02736	expressed protein
254231_at	AT4G23810	5.22849	-2.40873	-6.49166	-2.07921	-5.36002	-1.08419	-2.6101	-1.8749	-5.79141	-2.43149	-6.55558	WRKY family transcription factor, AR411 - Arabidopsis thaliana (thale cress), PID:g1669603
254266_at	AT4G23130	4.20181	-1.20141	-3.26416	-1.08797	-2.85566	-0.923568	-2.2432	-1.07703	-3.38133	-0.883379	-2.40723	receptor-like protein kinase 6 (RLK6), identical to receptor-like protein kinase 6 (Arabidopsis thaliana) GI:13506749; contains Pfam domain PF00069: Protein kinase domain
254271_at	AT4G23150	4.61639	-2.22001	-5.98247	-1.73197	-4.49466	-1.64826	-4.01891	-2.17616	-6.71829	-2.18777	-5.89036	protein kinase family protein, contains Pfam domain, PF00069: Protein kinase domain
254387_at	AT4G21850	4.85587	-1.70177	-4.59289	-1.93183	-4.98244	-1.69923	-4.01677	-1.19859	-3.7328	-0.816641	-2.18737	methionine sulfoxide reductase domain-containing protein / SeIR domain-containing protein, low similarity to pilin-like transcription factor (Homo sapiens) GI:5059062, SP|P14930 Peptide methionine sulfoxide reductase msrA/msrB (EC 1.8.4.6) {Neisseria gonorrhoeae}; contains Pfam profile PF01641: SelR domain
254640_at	AT4G18790	3.26008	-0.795708	-2.17485	-1.02375	-2.67489	-1.0328	-2.44957	-0.874635	-2.70275	-1.03469	-2.75888	NRAMP metal ion transporter 5, putative (NRAMP5), identical to heavy metal transporter (Arabidopsis thaliana)gi|12657269|emb|CAC27822; similar to metal transporter Nramp3 (Arabidopsis thaliana) gi|6468012|gb|AAF13278; member of the natural resistance-associated macrophage protein (NRAMP) metal transporter family, PMID:11500563
254869_at	AT4G11890	5.3204	-2.34837	-6.32547	-2.10074	-5.42285	-1.72484	-4.0727	-2.20065	-6.80976	-2.31673	-6.25168	protein kinase family protein, contains protein kinase domain, Pfam:PF00069
255521_at	AT4G02280	2.53271	0.811311	2.08974	0.961029	2.34522	1.08213	2.50535	0.791542	2.37618	1.00179	2.69844	sucrose synthase, putative / sucrose-UDP glucosyltransferase, putative, strong similarity to sucrose synthase GI:6682841 from (Citrus unshiu)
255595_at	AT4G01700	3.93657	-1.38719	-3.76815	-1.03144	-2.70496	-1.03467	-2.49903	-1.02503	-3.21001	-1.0929	-2.96174	chitinase, putative, similar to peanut type II chitinase GI:1237025 from (Arachis hypogaea)
256497_at	AT1G31580	6.62853	-2.70384	-7.27571	-1.78758	-4.63359	-1.18721	-2.84363	-1.75492	-5.41997	-2.48572	-6.68969	expressed protein, identical to ORF1 (Arabidopsis thaliana) gi|457716|emb|CAA50905
256600_at	AT3G14850	3.98252	-1.24515	-3.41056	-1.00204	-2.61488	-0.861123	-2.01727	-0.785581	-2.45333	-1.00047	-2.67823	expressed protein
256766_at	AT3G22231	6.75658	-4.02626	-10.8069	-2.74582	-7.05477	-2.82678	-6.66258	-3.29891	-10.1221	-4.15816	-11.1443	expressed protein
256933_at	AT3G22600	5.11817	-3.05075	-8.2118	-2.74271	-7.05417	-1.79565	-4.37	-2.85777	-8.83108	-2.84528	-7.68588	protease inhibitor/seed storage/lipid transfer protein (LTP) family protein, contains Pfam protease inhibitor/seed storage/LTP family domain PF00234
257130_at	AT3G20210	3.44153	-1.36111	-3.68993	-1.32505	-3.44532	-1.32871	-3.18152	-0.927167	-2.88928	-1.27995	-3.43345	vacuolar processing enzyme, putative / asparaginyl endopeptidase, putative, similar to asparaginyl endopeptidase (VmPE-1) (Vigna mungo) GI:4589396; contains Pfam profile PF01650: Peptidase C13 family; identical to cDNA vacuolar processing enzyme delta preproprotein (At3g20210) GI:24850432
258038_at	AT3G21260	3.48139	0.55547	1.43105	1.41541	3.5212	1.40074	3.29127	0.892546	2.68999	1.40732	3.81435	glycolipid transfer protein-related, contains weak similarity to Glycolipid transfer protein (GLTP) (Swiss-Prot:P17403) (Sus scrofa)
258203_at	AT3G13950	5.49987	-2.75777	-7.41594	-2.31204	-5.95984	-2.11588	-5.11939	-2.16355	-6.66254	-2.69794	-7.24374	expressed protein
258277_at	AT3G26830	3.65922	-1.13627	-3.09217	-1.10627	-2.89468	-1.12121	-2.70282	-1.1069	-3.45404	-1.12639	-3.04369	cytochrome P450 71B15, putative (CYP71B15), Identical to Cytochrome P450 (SP:Q9LW27) (Arabidopsis thaliana); similar to cytochrome P450 71B2 GB:O65788 (Arabidopsis thaliana)
258760_at	AT3G10780	3.75173	-1.14244	-3.12052	-1.02551	-2.70026	-0.972312	-2.32003	-0.869378	-2.70811	-0.900901	-2.43058	emp24/gp25L/p24 family protein, similar to SP|O35587 Transmembrane protein Tmp21 precursor (21 kDa Transmembrane trafficking protein) {Mesocricetus auratus}; contains Pfam profile: PF01105 emp24/gp25L/p24 family; contains non-consensus TG acceptor splice site at exon 3
258791_at	AT3G04720	3.72376	-1.35916	-3.68655	-1.14803	-2.99649	-1.23897	-2.99009	-0.913144	-2.84291	-1.34392	-3.62025	hevein-like protein (HEL), identical to SP|P43082 Hevein-like protein precursor {Arabidopsis thaliana}; similar to SP|P09762 Wound-induced protein WIN2 precursor {Solanum tuberosum}; contains Pfam profile PF00187: Chitin recognition protein
259173_at	AT3G03640	7.53669	-0.981482	-2.67873	-0.796576	-2.11308	-0.911475	-2.2003	-0.899495	-2.81928	-1.00261	-2.71425	glycosyl hydrolase family 1 protein, contains Pfam PF00232 : Glycosyl hydrolase family 1 domain; TIGRFAM TIGR01233: 6-phospho-beta-galactosidase; identical to beta-glucosidase GB:AAC31962 (Arabidopsis thaliana); similar to thioglucoside glucohydrolase (GI:984052) (Arabidopsis thaliana)
259385_at	AT1G13470	5.67433	-2.20661	-5.96215	-1.59391	-4.16625	-1.3271	-3.24471	-1.95189	-6.09108	-2.38087	-6.47003	expressed protein
259479_at	AT1G19020	5.29937	-2.34022	-6.3025	-1.93288	-4.9759	-1.31921	-3.1906	-1.33476	-4.10693	-2.29161	-6.14968	expressed protein
259550_at	AT1G35230	4.70593	-2.51718	-6.77299	-2.32824	-5.99296	-1.99803	-4.77161	-2.41163	-7.42067	-2.50713	-6.72894	arabinogalactan-protein (AGP5) mRNA, complete cds
259561_at	AT1G21250	8.04687	-2.85688	-7.68176	-1.15627	-3.03159	-1.21215	-2.93876	-1.67429	-5.1779	-2.65792	-7.1604	wall-associated kinase 1 (WAK1), identical to wall-associated kinase 1 (Arabidopsis thaliana) GI:3549626; expressed in leaves and stems & induced by pathogen infection (PMID:10380805)
259925_at	AT1G75040	8.59758	-2.76825	-7.46767	-1.83552	-4.7377	-1.68445	-4.05485	-2.51913	-7.73142	-3.20161	-8.57348	pathogenesis-related protein 5 (PR-5), identical to SP|P28493 Pathogenesis-related protein 5 precursor (PR-5) {Arabidopsis thaliana}; contains Pfam profile: PF00314 Thaumatin family
260116_at	AT1G33960	6.91227	-4.09483	-10.9825	-2.49404	-6.42207	-1.7335	-4.24484	-3.23158	-9.92746	-4.00125	-10.7541	Identified as a gene that is induced by avirulence gene avrRpt2 and RPS2 after infection with Pseudomonas syringae pv maculicola strain ES4326 carrying avrRpt2
260124_at	AT1G36340	4.62362	-1.96959	-5.31878	-1.84779	-4.78832	-1.95135	-4.72469	-1.60578	-5.02157	-1.95437	-5.30671	ubiquitin-conjugating enzyme family protein, similar to Ubiquitin-conjugating enzyme E2-16 kDa (EC 6.3.2.19) (Ubiquitin-protein ligase) (Ubiquitin carrier protein) from {Schizosaccharomyces pombe} SP|P46595, {Caenorhabditis elegans} SP|P35129; contains Pfam profile PF00179: Ubiquitin-conjugating enzyme
260568_at	AT2G43570	6.2116	-3.79738	-10.1844	-2.73267	-7.02253	-2.43974	-5.88925	-3.4967	-10.7203	-3.75795	-10.0693	chitinase, putative, similar to chitinase class IV GI:722272 from (Brassica napus)
260904_at	AT1G02450	6.0026	-1.70636	-4.60241	-0.979335	-2.57137	-1.15509	-2.81485	-1.30771	-4.07941	-1.40911	-3.81235	NIMIN1 modulates PR gene expression according the following model: NPR1 forms a ternary complex with NIMIN1 and TGA factors upon SAR induction that binds to a positive regulatory cis-element of the PR-1 promoter, termed LS7. This leads to PR-1 gene induction. NIMIN1 decreases transcriptional activation, possibly through its EAR motif, which results in fine-tuning of PR-1 gene expression.
261271_at	AT1G26795	4.52288	-2.34538	-6.32391	-1.95256	-5.05846	-2.33055	-5.65858	-1.30516	-4.10836	-2.30413	-6.27019	self-incompatibility protein-related, similar to S3 self-incompatibility protein (Papaver rhoeas) GI:1107841
261313_at	AT1G52970	4.06913	-1.68941	-4.5559	-1.63558	-4.20795	-1.6802	-3.90399	-1.59924	-4.84832	-1.68312	-4.42528	expressed protein
261443_at	AT1G28480	5.98292	-1.68672	-4.55877	-2.07386	-5.36486	-1.75195	-4.16623	-1.49597	-4.63093	-2.02247	-5.44428	glutaredoxin family protein, contains INTERPRO Domain IPR002109, Glutaredoxin (thioltransferase)
261648_at	AT1G27730	5.52232	-2.16616	-5.87376	-1.6827	-4.38907	-1.83615	-4.56341	-1.50403	-4.6551	-2.44037	-6.57682	Salt tolerance zinc finger protein responsive to chitin oligomers.
262085_at	AT1G56060	5.82895	-3.12474	-8.39635	-2.07849	-5.36126	-1.99279	-4.84189	-2.05225	-6.33347	-2.97591	-8.0092	expressed protein
262177_at	AT1G74710	5.71856	-1.69721	-4.59474	-1.50262	-3.93626	-1.27035	-3.1291	-1.16015	-3.68073	-2.0068	-5.49048	isochorismate synthase 1 (ICS1) / isochorismate mutase, identical to GI:17223087 and GB:AF078080; contains Pfam profile PF00425: chorismate binding enzyme; contains TIGRfam profile TIGR00543: isochorismate synthases; identical to cDNA isochorismate synthase 1 precursor (ICS1) nuclear gene for plastid product GI:17223086
262381_at	AT1G72900	5.4983	-2.65547	-7.14684	-2.03433	-5.25376	-1.83832	-4.32159	-1.85551	-5.70534	-2.54335	-6.82487	disease resistance protein (TIR-NBS class), putative, domain signature TIR-NBS exists, suggestive of a disease resistance protein.
262382_at	AT1G72920	4.19357	-1.3366	-3.62767	-1.09567	-2.8659	-1.32923	-3.16479	-1.21822	-3.77015	-1.30507	-3.49967	disease resistance protein (TIR-NBS class), putative, domain signature TIR-NBS exists, suggestive of a disease resistance protein.
262603_at	AT1G15380	4.69655	1.45707	3.83203	2.05102	5.12152	1.56651	3.70901	1.09729	3.36924	1.40419	3.84606	lactoylglutathione lyase family protein / glyoxalase I family protein, contains glyoxalase family protein domain, Pfam:PF00903
262705_at	AT1G16260	4.03009	-1.20032	-3.25782	-1.151	-2.993	-0.873303	-2.0515	-1.05422	-3.24586	-1.10344	-2.92825	protein kinase family protein, contains Pfam domain, PF00069: Protein kinase domain
262930_at	AT1G65690	5.06909	-1.64482	-4.46958	-1.2569	-3.29359	-1.54713	-3.81826	-1.21326	-3.79183	-1.63149	-4.42593	harpin-induced protein-related / HIN1-related / harpin-responsive protein-related, similar to hin1 homolog (GI:13122296) (Arabidopsis thaliana); similar to hin1 (GI:22830759) (Nicotiana tabacum); contains 1 transmembrane domain;
263539_at	AT2G24850	6.99657	-4.7255	-12.6656	-3.92241	-10.0619	-4.2953	-10.1811	-2.37878	-7.29996	-4.53099	-12.1703	aminotransferase, putative, similar to nicotianamine aminotransferase from Hordeum vulgare (GI:6498122, GI:6469087); contains Pfam profile PF00155 aminotransferase, classes I and II
263584_at	AT2G17040	5.78597	-3.00218	-8.07279	-1.67215	-4.34195	-1.70718	-4.19985	-2.12907	-6.5844	-2.94235	-7.93076	no apical meristem (NAM) family protein, contains Pfam PF02365: No apical meristem (NAM) domain; similar to petunia NAM (X92205) and A. thaliana sequences ATAF1 (X74755) and ATAF2 (X74756); probable DNA-binding protein
263783_at	AT2G46400	5.6254	-2.90499	-7.82476	-2.71656	-6.99649	-2.2919	-5.56292	-2.48136	-7.69899	-2.71492	-7.35303	WRKY family transcription factor
263852_at	AT2G04450	7.18371	-4.03099	-10.8299	-2.61819	-6.74559	-1.62549	-3.90545	-2.88112	-8.89916	-3.92682	-10.6036	MutT/nudix family protein, similar to SP|P53370 Nucleoside diphosphate-linked moiety X motif 6 {Homo sapiens}; contains Pfam profile PF00293: NUDIX domain
264434_at	AT1G10340	5.46864	-2.95968	-7.96266	-2.00089	-5.17666	-0.885811	-2.15251	-1.75043	-5.42543	-2.94232	-7.9402	ankyrin repeat family protein, contains ankyrin repeat domains, Pfam:PF00023
264635_at	AT1G65500	6.18272	-3.32302	-8.93817	-1.85657	-4.79902	-1.92493	-4.74823	-2.7944	-8.59783	-3.82106	-10.2886	expressed protein
265511_at	AT2G05540	6.4997	1.55869	4.0942	2.93339	7.35807	3.55466	8.41838	2.06966	6.31382	1.51112	4.06061	glycine-rich protein
265837_at	AT2G14560	8.34155	-3.41499	-9.20329	-2.1072	-5.44735	-1.57537	-3.74754	-2.00081	-6.1651	-2.63893	-7.05963	expressed protein, contains Pfam profile PF04525: Protein of unknown function (DUF567)
265993_at	AT2G24160	5.97137	-3.3207	-8.91985	-2.18904	-5.64852	-1.36889	-3.42728	-2.35392	-7.30502	-3.23896	-8.76749	pseudogene, leucine rich repeat protein family, contains leucine rich-repeat domains Pfam:PF00560, INTERPRO:IPR001611; contains some similarity to Cf-4 (Lycopersicon hirsutum) gi|2808683|emb|CAA05268; blastp match of 37% identity and 8.4e-98 P-value to GP|2808683|emb|CAA05268.1||AJ002235 Cf-4 {Lycopersicon hirsutum}
266070_at	AT2G18660	9.94546	-5.19935	-13.9159	-2.35975	-6.09035	-1.821	-4.40269	-2.54291	-7.86943	-5.04882	-13.6479	expansin family protein (EXPR3), identical to Expansin-related protein 3 precursor (Ath-ExpGamma-1.2) (Swiss-Prot:Q9ZV52) (Arabidopsis thaliana); contains Prosite PS00092: N-6 Adenine-specific DNA methylases signature;
266071_at	AT2G18680	4.81724	-1.99022	-5.36799	-1.45735	-3.80252	-1.1614	-2.77511	-1.84175	-5.69642	-2.01955	-5.43951	expressed protein
266385_at	AT2G14610	7.79647	-5.09731	-13.6756	-2.24893	-5.78246	-3.27931	-7.97035	-3.8466	-11.8345	-4.99327	-13.4422	pathogenesis-related protein 1 (PR-1), identical to GB:M90508 SP|P33154
267028_at	AT2G38470	4.82589	-2.29589	-6.18784	-1.52862	-3.98338	-1.34699	-3.16768	-1.25819	-3.86768	-1.94195	-5.1986	WRKY family transcription factor, contains Pfam profile: PF03106 WRKY DNA -binding domain;
267165_at	AT2G37710	6.40992	-1.26449	-3.42696	-1.036	-2.73055	-1.00405	-2.4698	-1.10977	-3.4702	-1.05337	-2.8594	Induced in response to Salicylic acid.
267567_at	AT2G30770	4.35019	-1.5461	-4.18378	-1.51702	-3.93208	-1.44947	-3.44742	-1.53347	-4.74513	-1.53917	-4.1374	cytochrome P450 71A13, putative (CYP71A13), Identical to Cytochrome P450 71A13 (SP:O49342) (Arabidopsis thaliana); similar to Cytochrome P450 (gi:5713172) (Nicotiana tabacum).
